# Supplementary material
Source: bioRxiv or medRxiv preprint supplement (http://biorxiv.org/highwire/filestream/86018/field_highwire_adjunct_files/2/082396-3.pdf)
Supplement: Supplementary file [file 082396-3.pdf]

## SUPPORTING FIGURES

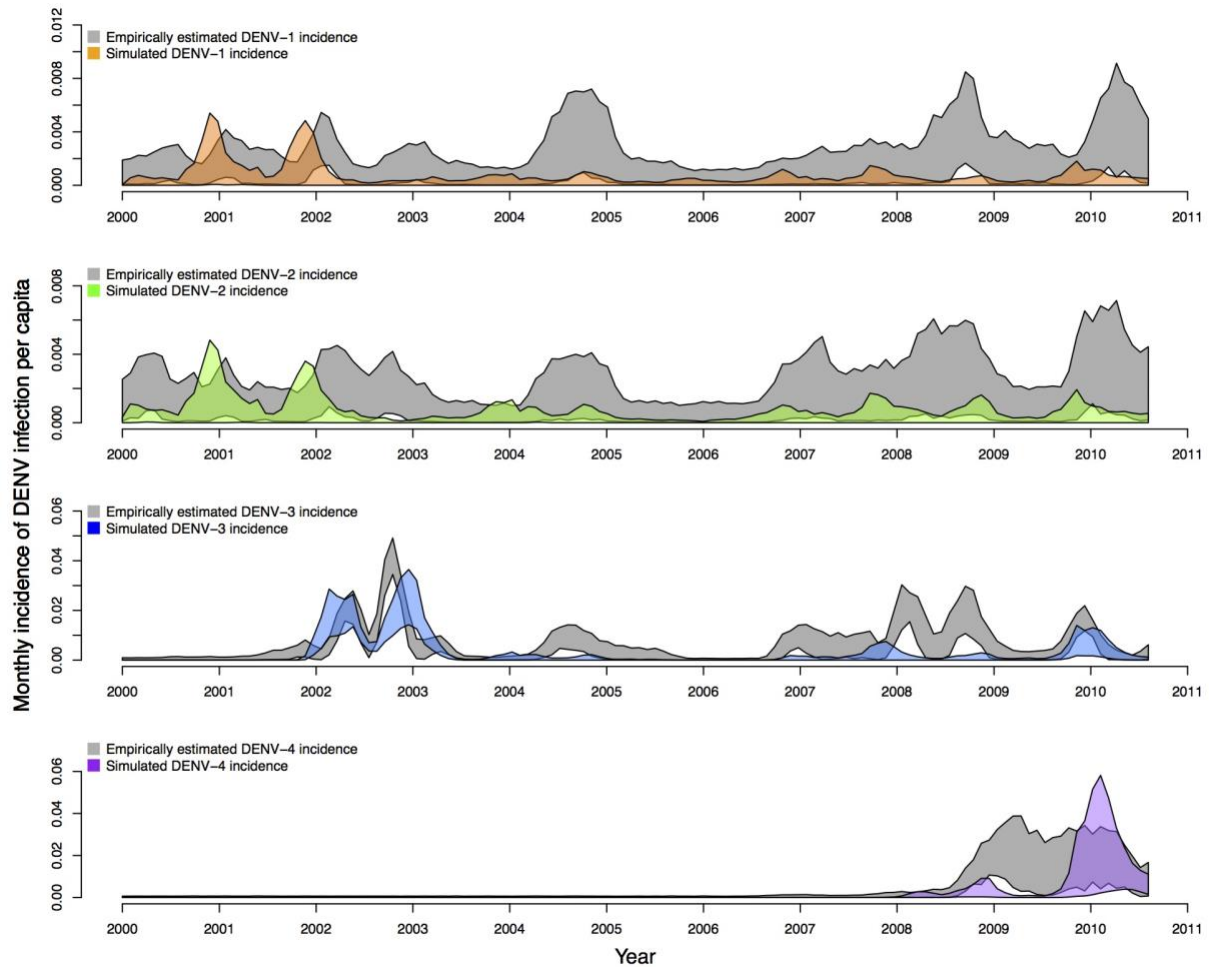

**Figure S1. Monthly, serotype-specific incidence of infection per capita, as estimated by Reiner et al. [16] (gray bands) and as reproduced by our calibrated model (colored bands).** Bands show the range of values in which 95% of simulated values lie for a given serotype in a given month. These values were obtained under the assumption that the period of temporary cross-immunity is exponentially distributed with a mean of 180 days.

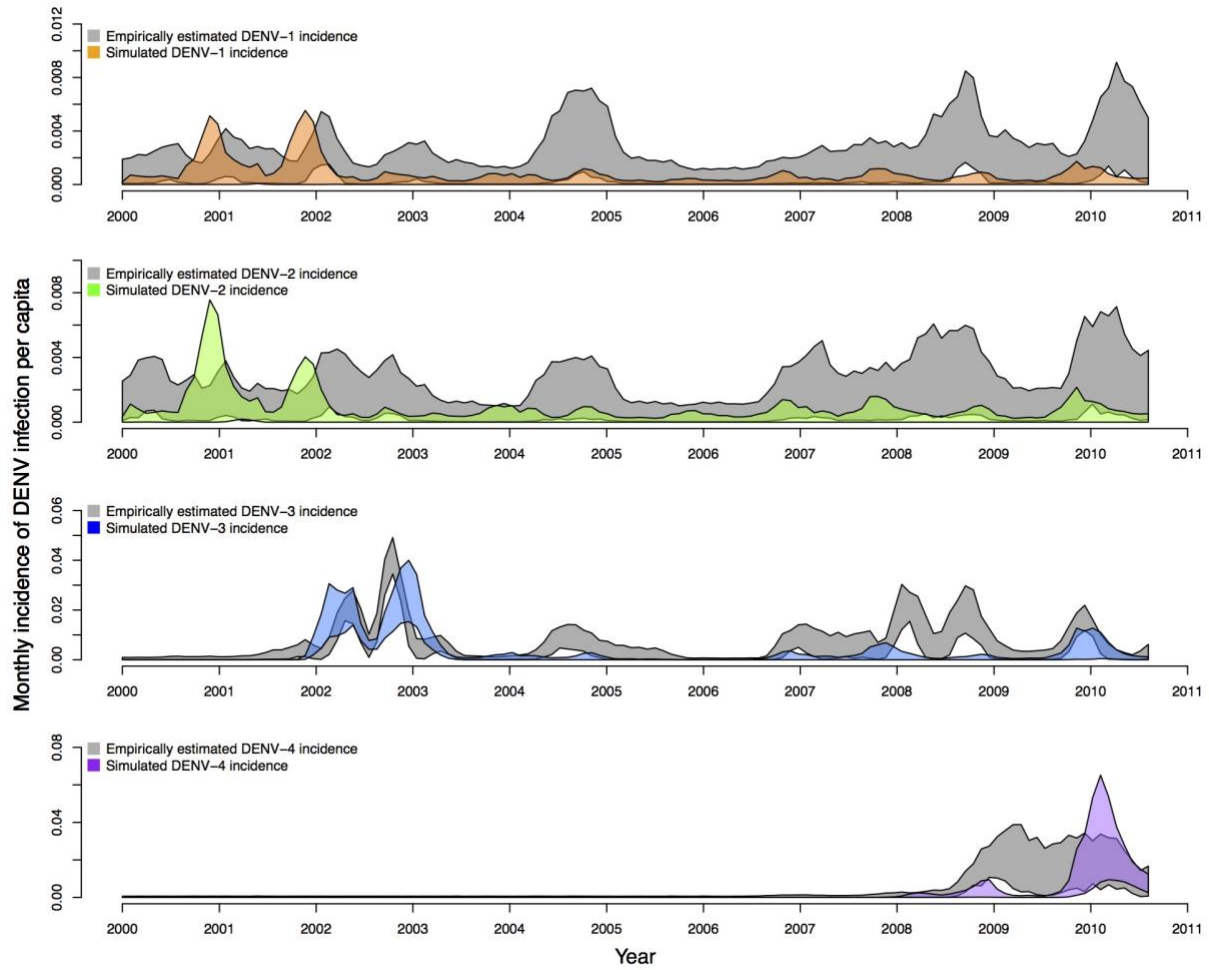

**Figure S2. Monthly, serotype-specific incidence of infection per capita, as estimated by Reiner et al. [16] (gray bands) and as reproduced by our calibrated model (colored bands).** Bands show the range of values in which 95% of simulated values lie for a given serotype in a given month. These values were obtained under the assumption that the period of temporary cross-immunity is exponentially distributed with a mean of 360 days.

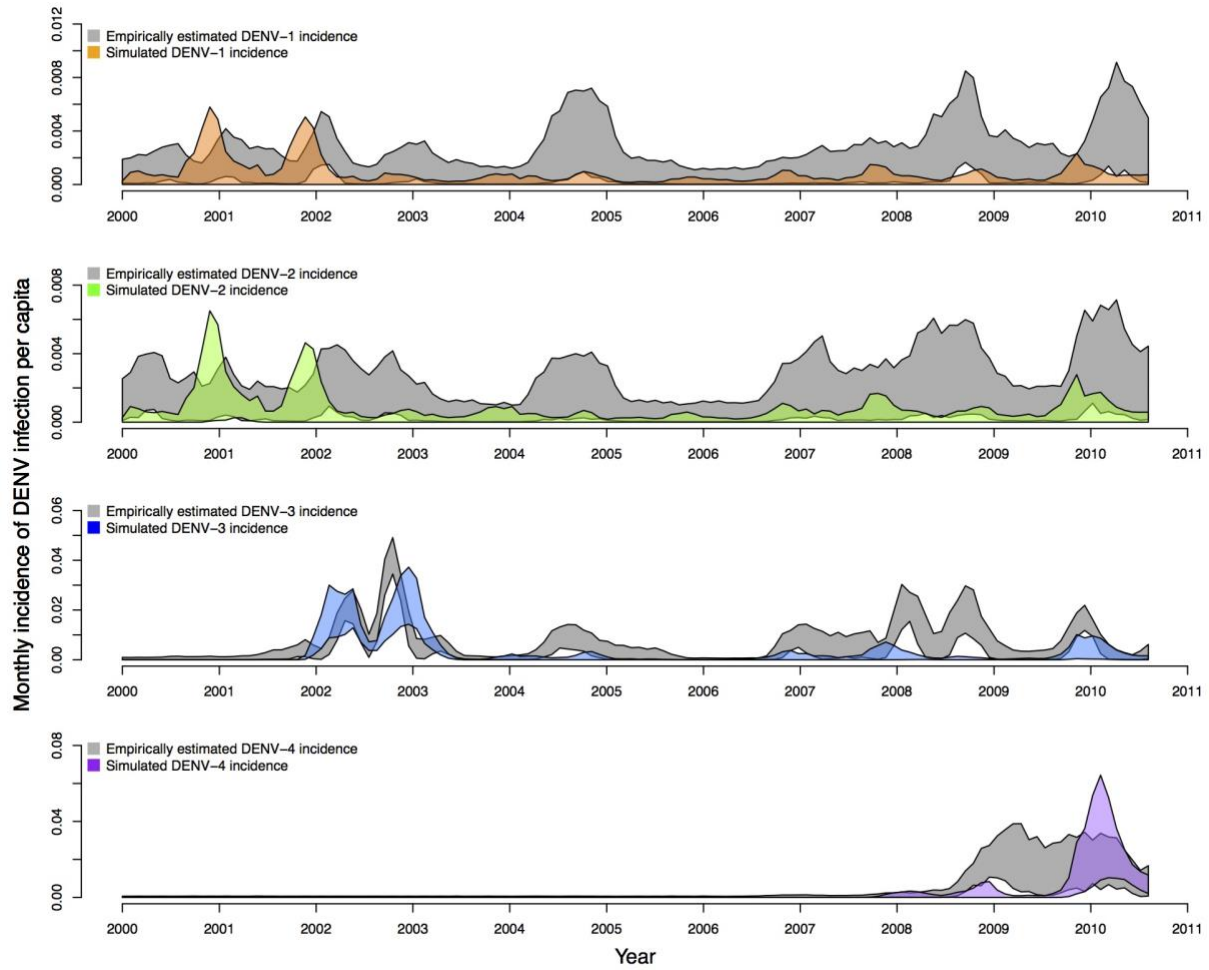

**Figure S3. Monthly, serotype-specific incidence of infection per capita, as estimated by Reiner et al. [16] (gray bands) and as reproduced by our calibrated model (colored bands).** Bands show the range of values in which 95% of simulated values lie for a given serotype in a given month. These values were obtained under the assumption that the period of temporary cross-immunity is fixed at 180 days.

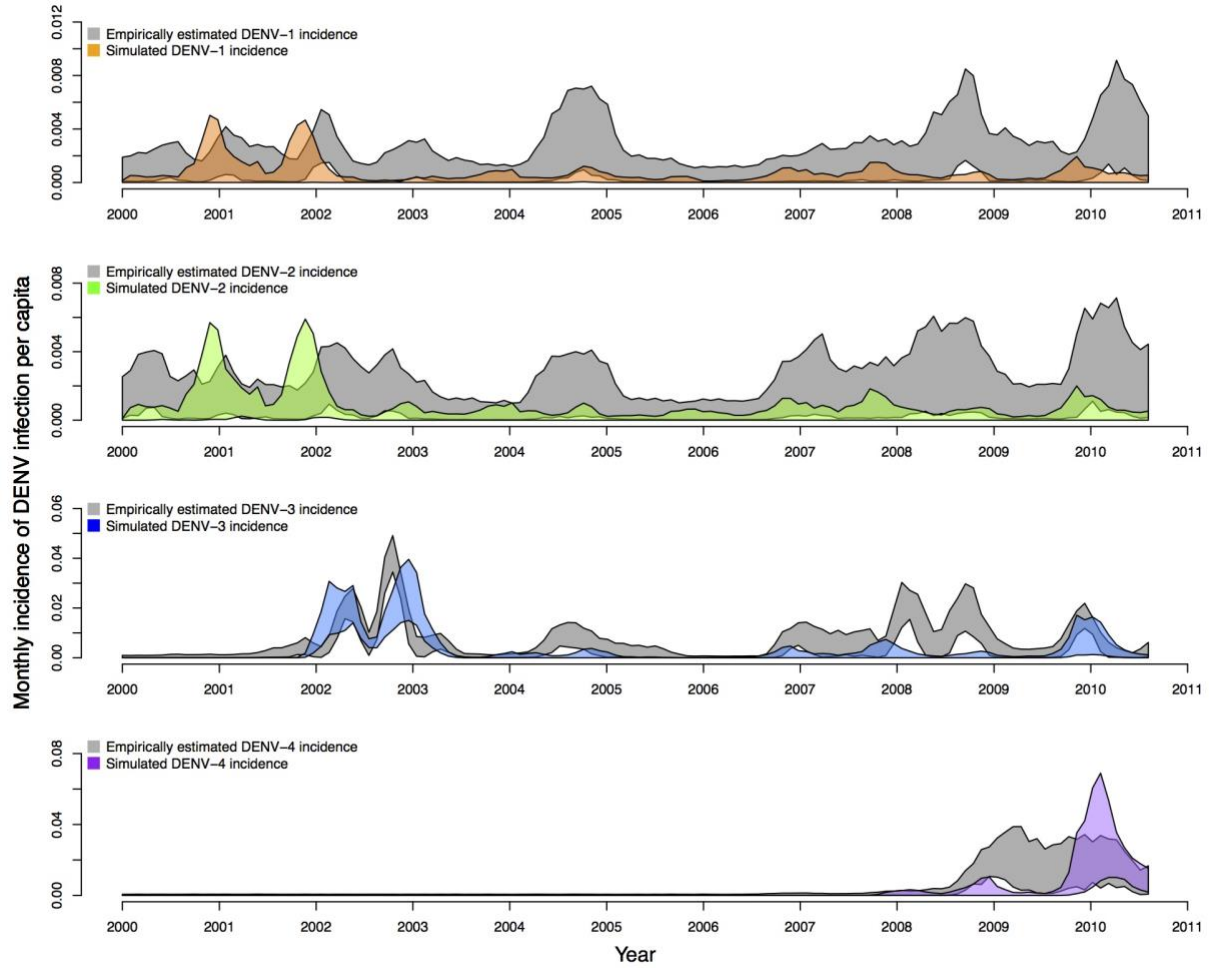

**Figure S4. Monthly, serotype-specific incidence of infection per capita, as estimated by Reiner et al. [16] (gray bands) and as reproduced by our calibrated model (colored bands).** Bands show the range of values in which 95% of simulated values lie for a given serotype in a given month. These values were obtained under the assumption that the period of temporary cross-immunity is fixed at 360 days.

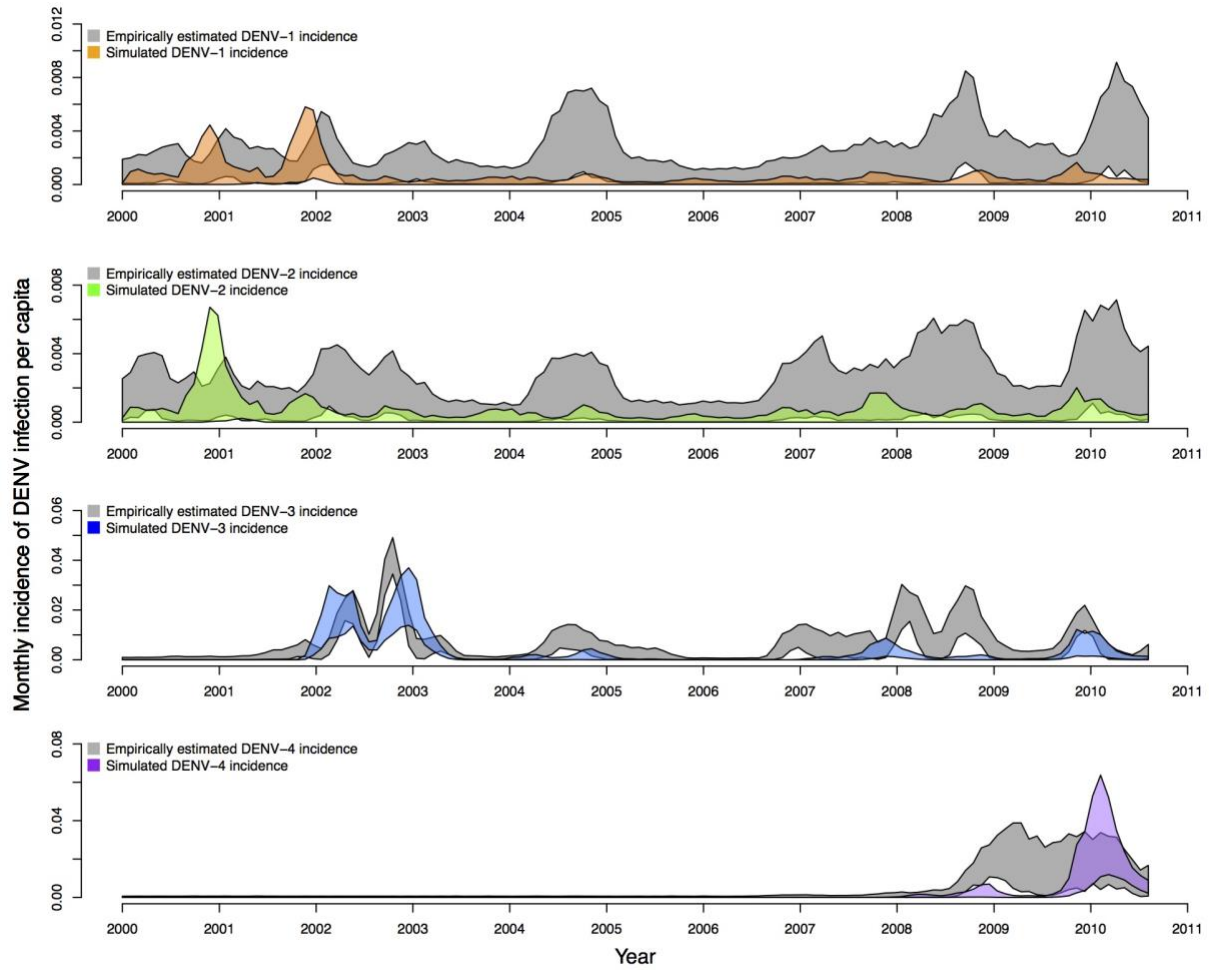

**Figure S5. Monthly, serotype-specific incidence of infection per capita, as estimated by Reiner et al. [16] (gray bands) and as reproduced by our calibrated model (colored bands).** Bands show the range of values in which 95% of simulated values lie for a given serotype in a given month. These values were obtained under the assumption that the period of temporary cross-immunity is fixed at 686 days.

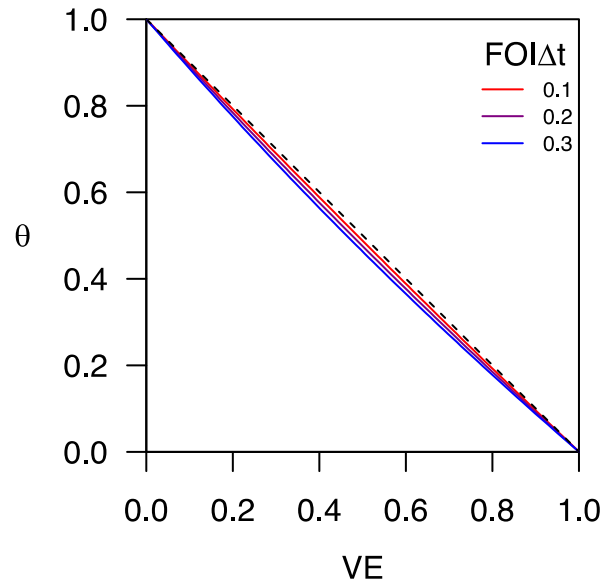

**Figure S6. Relationship between vaccine efficacy against disease (VE) and per-exposure protection,  $\theta$ , for different values of the infection attack rate,  $FOI\Delta t$ , over the period of a vaccine trial.**
